# Supplementary material
Source: Springer Nature journal article supplement (https://www.springermedizin.de/resource/supplementary/12997_2012_89_MOESM2_ESM.pdf/9623320)

Consecutive patients referred to clinic with >8 weeks of cough recruited into the study. If on treatment with an angiotensin converting enzyme inhibitor, treatment stopped for at least 1 month prior to appointment.

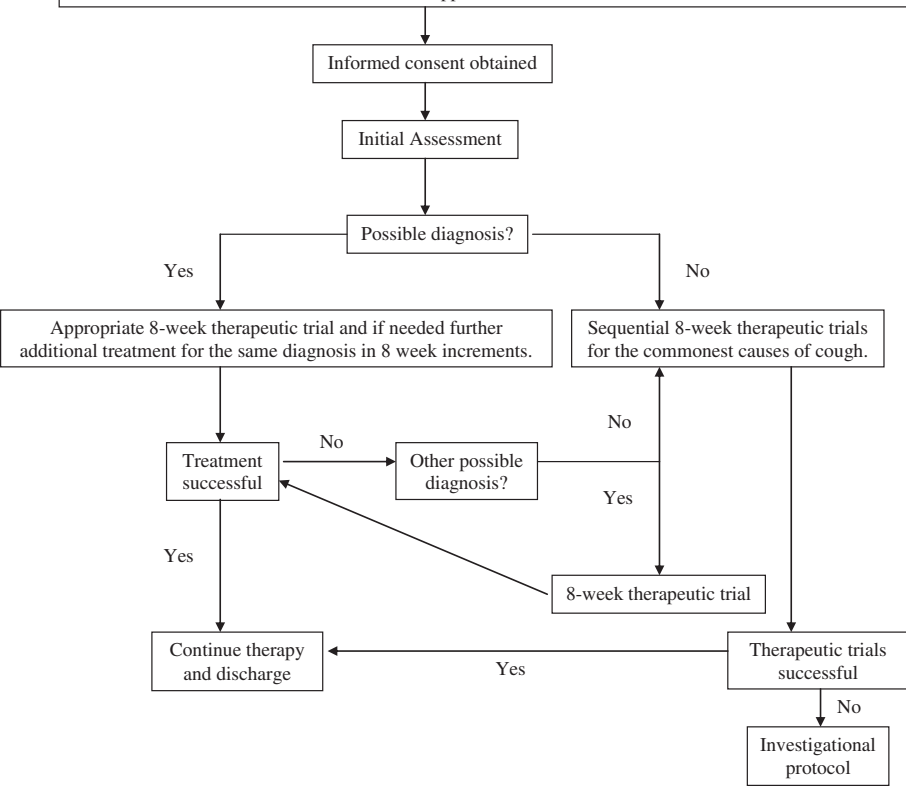

Supplement: MOESM2 [file 9623320]
